# Supplementary material for: Identification and functional characterization of aβ-glucosidase fromBacillus tequelensisBD69 expressed in bacterial and yeast heterologous systems
Source: PeerJ journal article supplement (doi:10.7717/peerj.8792), 2020-03-30
Supplement: Full_length_gene_sequence_MK774666.pdf [file Full_length_gene_sequence_MK774666.pdf]

> Beta-glucosidase from *Bacillus tequilensis* (Bteqβgluc; MK774666)

ATGACAAAAGGATTGAAGATTGTAACGATTGGCGGAGGTTCAAGCTATACGCCCGTGCTAGTGGAAGGGTTCATT  
AAACGGTATGATGAGCTGCCTGTGCGTGAATTATGGCTCGTCGATATCCCTGAAGGCCGAAGAAAAGCTGAATATT  
GTCGGCACACTCGCCAAACGGATGGTTGAAAAAGCAGGCGTCCCGATCGACATTCATCTTACGCCCGATCGGAGA  
AAAGCGCTGAAAGACGCAGACTTTGTTACGACTCAATTCGTGTCGGACTTTTGCAGGCAAGAGCAAAGGATGAG  
CGCATTCCACTAAAATACGGAGTAATTGGCCAGGAAACAAACGGTCCGGGAGGCCTGTTTAAAGGATTACGCACG  
ATTCCGGTCATCCTTGAGATCGAAAGGATATAGAAGAGCTCTGCCCCAACGCTTGGCTTGTTAACTTCACAAACC  
CTGCCGGCATGGTAACAGAAGCCTTGCTTCGCTACTCCAACCTGAAGAAAGTCGTGGTCTTTGTAATGTTCCAAT  
CGGCATTAATAATGGGCGTAGCCAAAGCGCTTGATGTAGATGTGGACCGCGTAGAAGTCCAATTCGCCGGACTGAA  
TCATATGGTGTTCGGGCTGGATGTTTTCTTGGACGGCGTAAGTGTGAAAGAGCAAGTCATCGAGGCGATGGGTGA  
CCCGAAAAACGCGATGACGATGAAAAATACCTCAGGCGCCGAATGGGAACCGGATTTCTTAAAAGCGCTCAATGT  
GATCCCTTGCGGCTATCACCGTTACTATTTCAAACAAAAGAAATGCTGGAGCACGAACTGGAAGCATCACAAACG  
GAGGGCACCCGCGCTGAAGTCGTGCAAAAGGTCGAAAAAGAGCTGTTTGAGCTCTATAAAGATCCGAACCTTGCG  
ATCAAACCGCCGCGAGCTGGAAAAACGGGGCGGAGCTTACTACAGTGATGCAGCATGTAACCTAATCAGCTCCATT  
TACAATGATAAACATGACATTCAGCCGGTGAACACGATCAATAATGGTGCAATAGCGAGCATTCCGGACGATTCC  
GCAGTTGAAGTGAAGTGTGTGATGACGAAAAACAGGCCCTAAGCCAATTGCTGTGCGGCGACTTGCCGGTGTCTGTC  
CGAGGCCTCGTCCAGCAAATCAAATCCTTTGAGCGTGTGCGCAGCAGAAGCGGCAGTTACAGGTGACTATCAAACC  
GCCCTCCTTGCCATGACGACTAACCCGCTTGTCCCGTCCGATGCTGTGGCCAAACAGATTTTAGACGACATGCTGG  
AGGCGCACAAAGCGTATCTGCCGAGTTTTTCAACAAAATTGAAGCGTAA
