# Supplementary material for: Identification and functional characterization of aβ-glucosidase fromBacillus tequelensisBD69 expressed in bacterial and yeast heterologous systems
Source: PeerJ journal article supplement (doi:10.7717/peerj.8792), 2020-03-30
Supplement: peerj-supplementary_file.R1.pdf [file peerj-supplementary_file.R1.pdf]

**PEERJ**

**Molecular docking and functional characterization of  $\beta$ -glucosidase from *Bacillus***

***tequelensis* BD69 expressed in bacterial and yeast heterologous systems**

Ahmad Raza<sup>1,2,3</sup>, Ratnasri Pothula<sup>3</sup>, Heba Abdelgaffar<sup>3</sup>, Saira Bashir<sup>1,2</sup> and Juan Luis Jurat-Fuentes<sup>3</sup>

<sup>1</sup>National Institute for Biotechnology and Genetic Engineering (NIBGE), P.O. Box 577, Jhang Road, Faisalabad, Pakistan

<sup>2</sup>Pakistan Institute of Engineering and Applied Sciences (PIEAS), Islamabad, Pakistan

<sup>3</sup>Department of Entomology and Plant Pathology, University of Tennessee, Knoxville, TN 37996, USA.

**Corresponding authors:**

Saira Bashir,

[sairabashir@gmail.com](mailto:sairabashir@gmail.com)

Juan Luis Jurat-Fuentes,

[jurat@utk.edu](mailto:jurat@utk.edu)

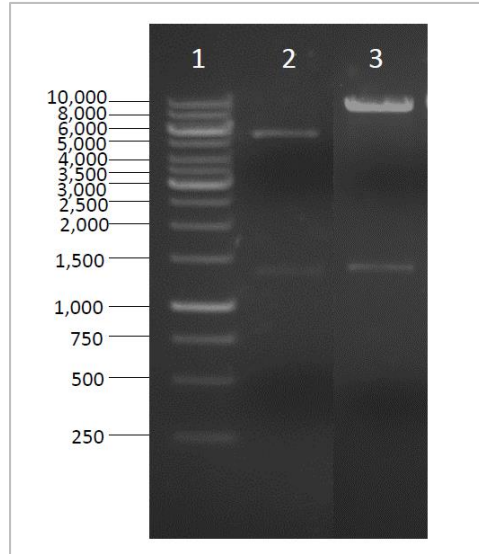

Fig S1. Double digestion of positive clones with EcoRI and NotI; Lane 1: GeneRuler 1-kb DNA ladder (Thermo Scientific); Lane 2: double digested pET-Bteq $\beta$ gluc; Lane 3: double digested pPIC-Bteq $\beta$ gluc.

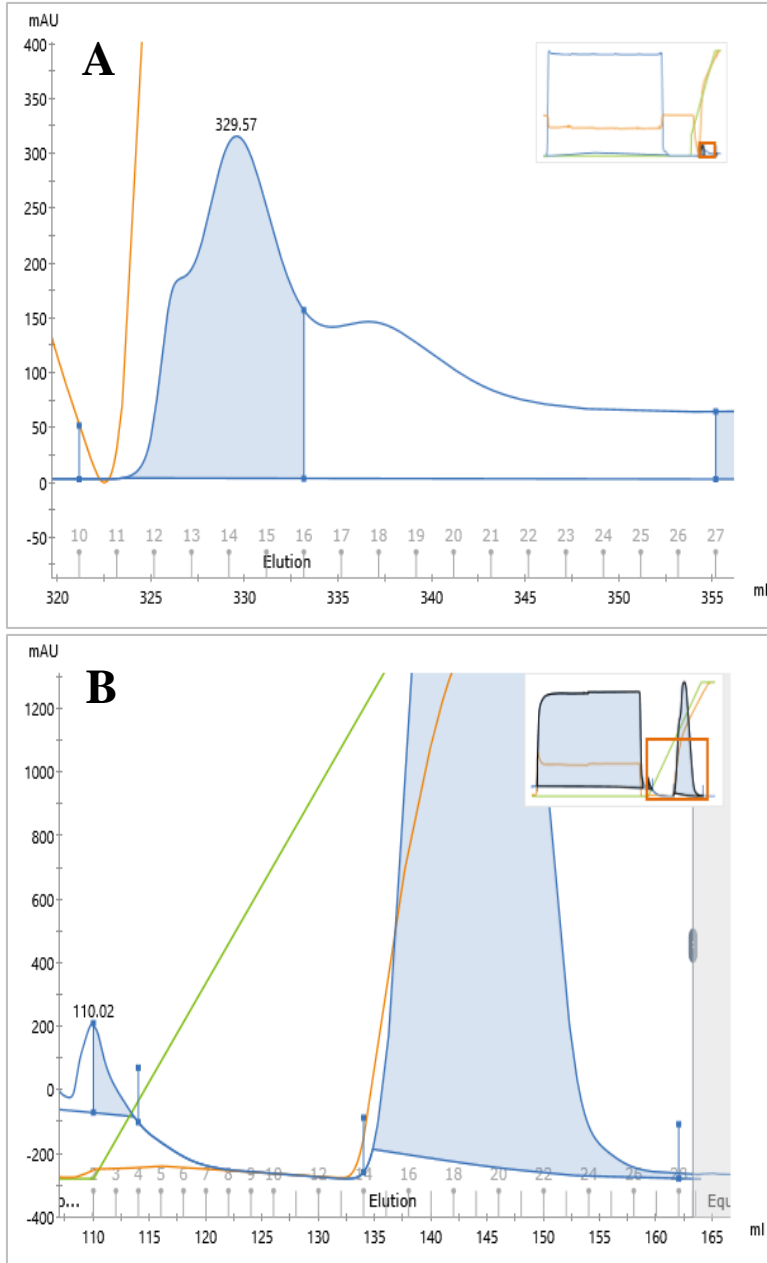

Fig S2. Chromatogram of  $\beta$ -glucosidase purification from AKTA Pure FPLC system (A) pET-Bteq $\beta$ gluc (B) pPIC-Bteq $\beta$ gluc.

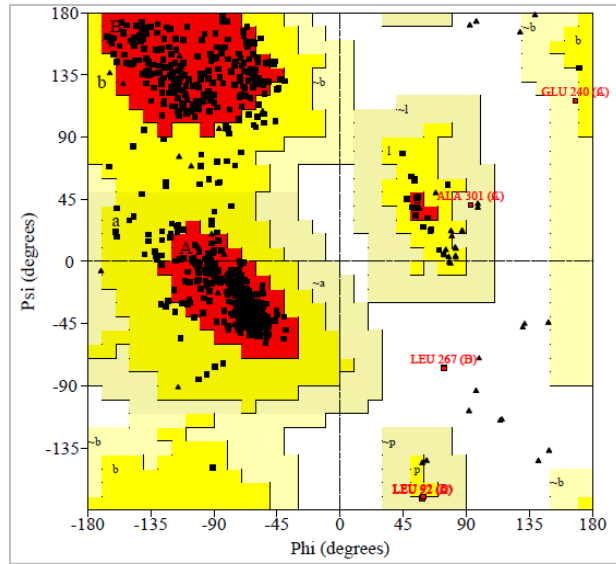

Fig S3. Ramachandran's plot with >90% residues in the most favored regions for structural quality assessment of predicted Bteqβgluc structure.

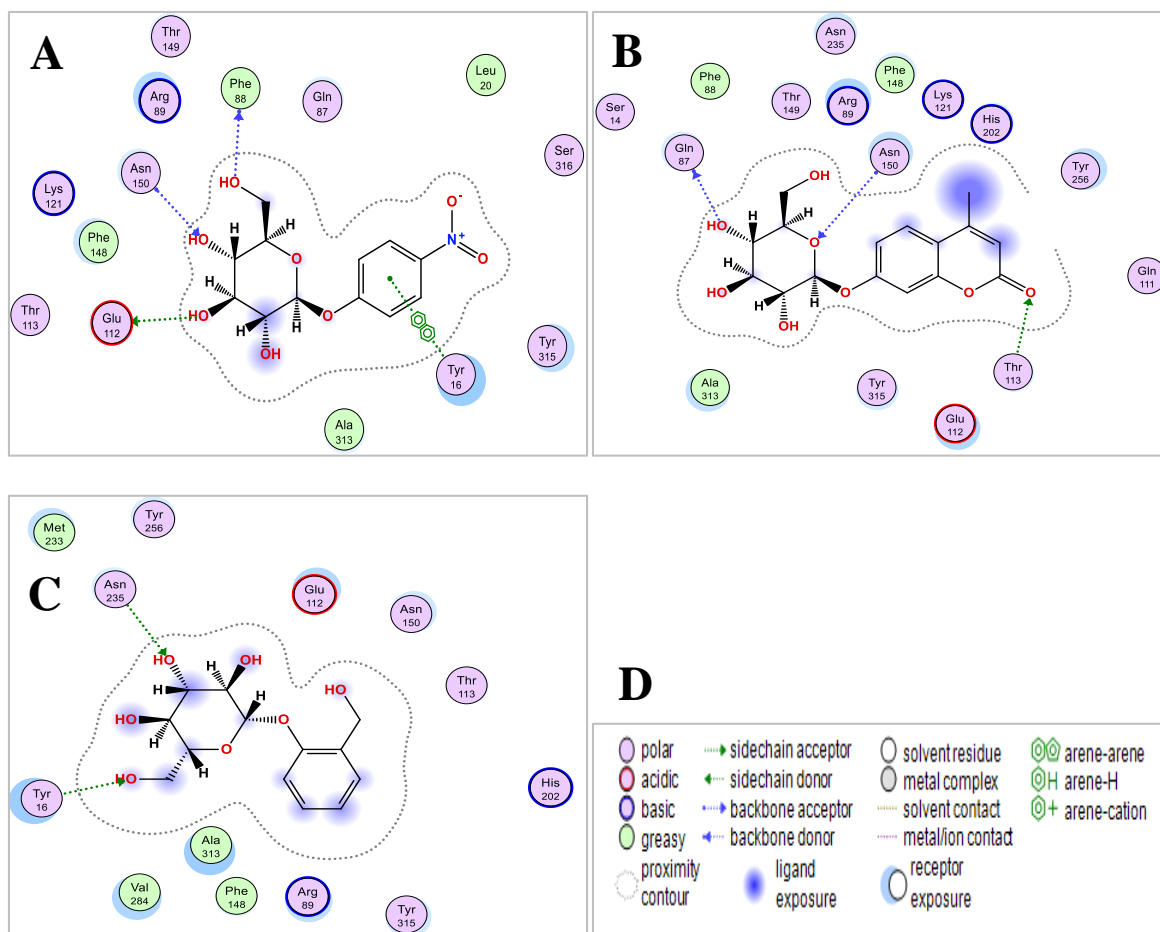

Fig. S4. Two dimensional representation of protein ligand interaction of docking complexes for (A) Bteqβgluc-pNPG, (B) Bteqβgluc-MUG, (C) Bteqβgluc-salicin and (D) legends of interaction diagram.

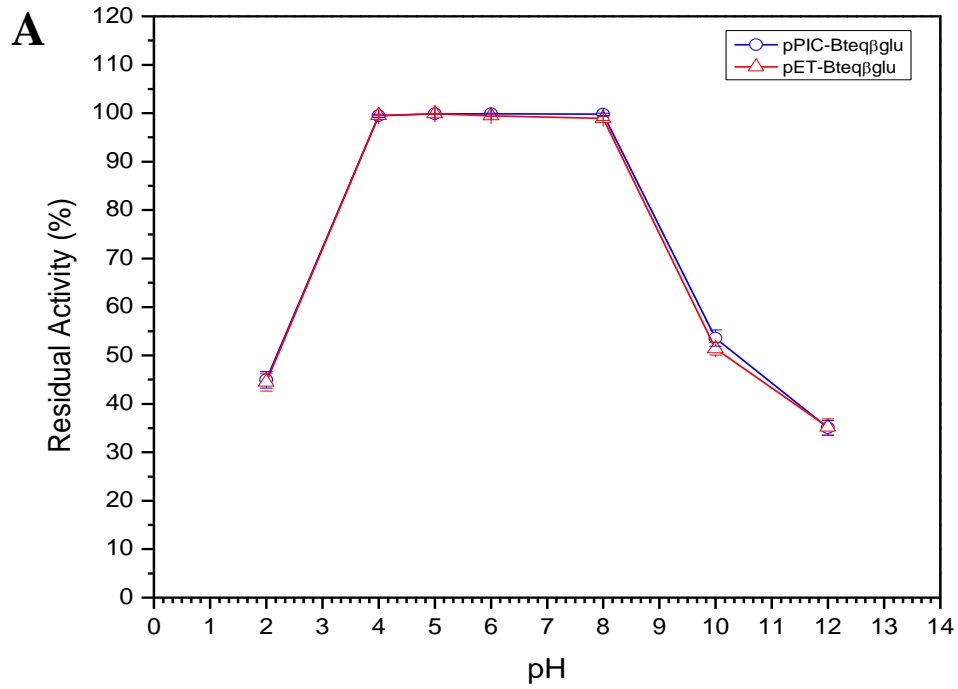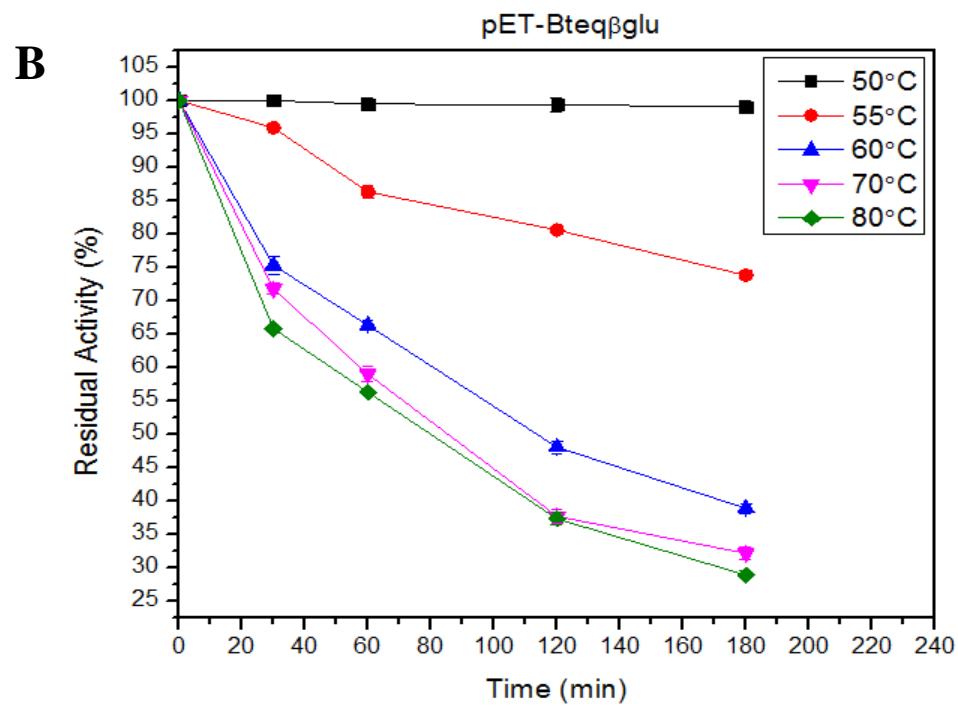

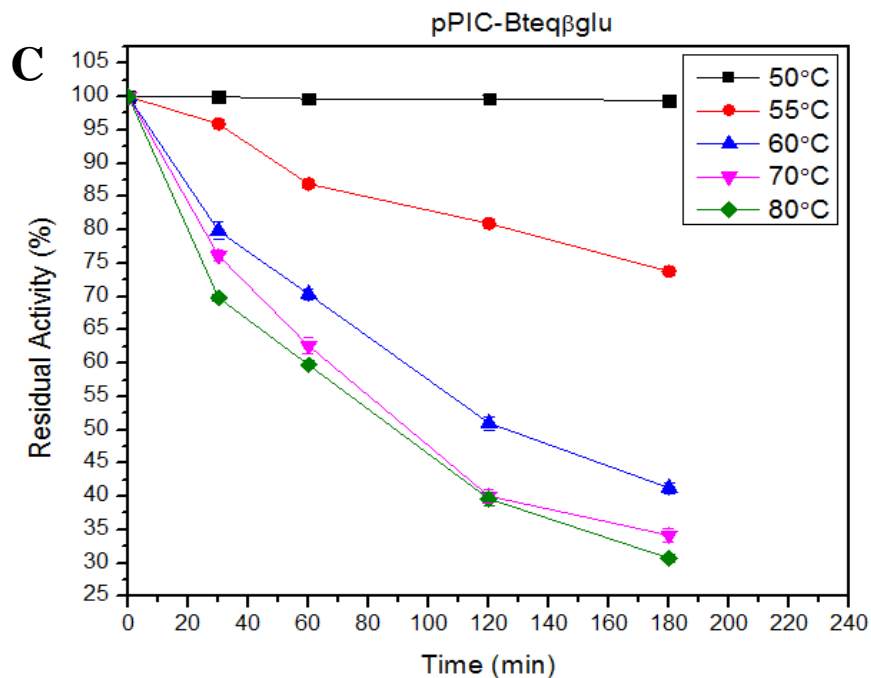

Fig. S5. pH stability (A) of pET-Bteqβgluc and pPIC-Bteqβgluc enzyme determined by pre-incubating at different pH values (2-12) at 50°C for 1 h and thermal-stability of pET-Bteqβgluc (B) pPIC-Bteqβgluc (C) was determined by pre-incubating enzyme at different temperature ranging from 50-80°C.

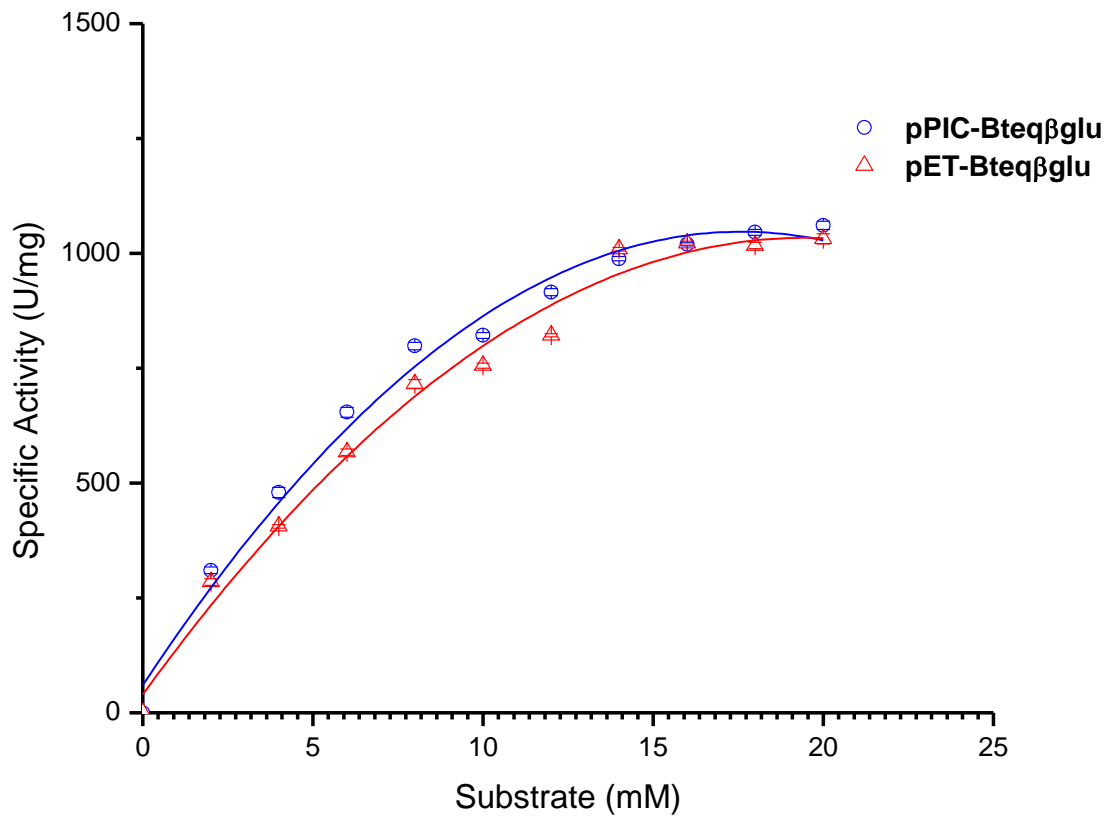

Fig. S6. Non-linear Michaelis-Menten plot of initial reaction velocity (U/mg) versus substrate concentration (mM) at a constant enzyme concentration for pPIC-Bteqβgluc and pET-Bteqβgluc.



Table S1. Summary of Two-way ANOVA test showing interaction effects within and between different substrate concentrations (2-20 mM) and enzyme culture groups (pET-Bteq $\beta$ gluc and pPIC-Bteq $\beta$ gluc) for specific activities.

Dependent Variable: Specific activities

| Source                   | Type III Sum of Squares  | df | Mean Square  | F          | Sig. |
|--------------------------|--------------------------|----|--------------|------------|------|
| Corrected Model          | 3792862.188 <sup>a</sup> | 19 | 199624.326   | 3719.180   | .000 |
| Intercept                | 37088675.270             | 1  | 37088675.270 | 690995.264 | .000 |
| Groups (pET & pPIC)      | 32073.775                | 1  | 32073.775    | 597.563    | .000 |
| Substrate concentrations | 3739327.880              | 9  | 415480.876   | 7740.781   | .000 |
| Groups * Sub. con.       | 21460.534                | 9  | 2384.504     | 44.425     | .000 |
| Error                    | 2146.971                 | 40 | 53.674       |            |      |
| Total                    | 40883684.430             | 60 |              |            |      |
| Corrected Total          | 3795009.160              | 59 |              |            |      |

a. R Squared = .999 (Adjusted R Squared = .999)

Table S2. Summary of Two-way ANOVA test showing interaction effects within and between different temperatures (30-80°C) and enzyme culture groups (pET-Bteq $\beta$ gluc and pPIC-Bteq $\beta$ gluc) for specific activities.

Dependent Variable: Specific activities

| Source              | Type III Sum of Squares  | df | Mean Square  | F          | Sig. |
|---------------------|--------------------------|----|--------------|------------|------|
| Corrected Model     | 6102759.597 <sup>a</sup> | 17 | 358985.859   | 4425.912   | .000 |
| Intercept           | 22733965.084             | 1  | 22733965.084 | 280285.524 | .000 |
| Groups (pET & pPIC) | 37890.236                | 1  | 37890.236    | 467.146    | .000 |
| Temperature         | 6043385.327              | 8  | 755423.166   | 9313.561   | .000 |
| Groups * Temp.      | 21484.034                | 8  | 2685.504     | 33.109     | .000 |
| Error               | 2919.961                 | 36 | 81.110       |            |      |
| Total               | 28839644.641             | 54 |              |            |      |
| Corrected Total     | 6105679.558              | 53 |              |            |      |

a. R Squared = 1.000 (Adjusted R Squared = .999)

Table S3. Summary of Two-way ANOVA test showing interaction effects within and between different pH (4-10) and enzyme culture groups (pET-Bteqβgluc and pPIC-Bteqβgluc) for Log10  $V_{max}$ .

Dependent Variable: Log10  $V_{max}$

| Source              | Type III Sum of Squares | df | Mean Square | F           | Sig. |
|---------------------|-------------------------|----|-------------|-------------|------|
| Corrected Model     | .795 <sup>a</sup>       | 7  | .114        | 1051.464    | .000 |
| Intercept           | 192.927                 | 1  | 192.927     | 1786144.502 | .000 |
| Groups (pET & pPIC) | .004                    | 1  | .004        | 37.215      | .000 |
| pH                  | .777                    | 3  | .259        | 2396.707    | .000 |
| Groups * pH         | .014                    | 3  | .005        | 44.303      | .000 |
| Error               | .002                    | 16 | .000        |             |      |
| Total               | 193.724                 | 24 |             |             |      |
| Corrected Total     | .797                    | 23 |             |             |      |

a. R Squared = .998 (Adjusted R Squared = .997)
