# Supplementary material for: Identification and functional characterization of a β-glucosidase from Bacillus tequelensis BD69 expressed in bacterial and yeast heterologous systems
Source: PeerJ. 2020 Mar 30;8:e8792. doi: 10.7717/peerj.8792 (PMC7115751; doi:10.7717/peerj.8792)
Supplement: Supplemental Information 2 — Raw data used for the preparation of the Dixon, Arrhenius and Lineweaver-Burk plots. [file peerj-08-8792-s002.xlsx]

## Sheet: Lineweave burk
	pET-Bteqβgluc							pPIC-Bteqβgluc
	Substrate (mM)	Average Specific Activity (U/mg)	1/S	1/V				Substrate (mM)	Average Specific Activity (U/mg)	1/S	1/V
	2	284.857	0.5	0.00351053				2	310.037	0.5	0.00322543
	4	405.8	0.25	0.00246427				4	479.707	0.25	0.00208461
	6	567.029	0.166667	0.00176358				6	654.029	0.166667	0.00152898
	8	715.714	0.125	0.00139721				8	798.267	0.125	0.00125271
	10	755.771	0.1	0.00132315				10	821.612	0.1	0.00121712
	12	822	0.0833333	0.00121655				12	915.751	0.0833333	0.001092
	14	1009.06	0.0714286	0.000991021				14	988.275	0.0714286	0.00101186
	16	1021.82	0.0625	0.000978648				16	1019.41	0.0625	0.000980956
	18	1017.29	0.0555556	0.000983				18	1045.68	0.0555556	0.000956318
	20	1031.67	0.05	0.000969305				20	1060.64	0.05	0.000942826
	pET-Bteqβgluc							pPIC-Bteqβgluc
	Substrate (mM)	Specific Activity (U/mg)			Average	STD		Substrate (mM)	Specific Activity (U/mg)			Average	STD
		1	2	3					1	2	3
	2	286.857	290.857	276.857	284.857	7.2111		2	318.286	304.286	307.538	310.037	7.32671
	4	409.6	402.17	405.63	405.8	3.71792		4	492.457	471.429	475.235	479.707	11.2048
	6	558.6	573.457	569.029	567.029	7.62782		6	658.457	661.886	641.745	654.029	10.7757
	8	707.029	714.4	725.714	715.714	9.41193		8	807.029	791.543	796.231	798.267	7.9412
	10	750.343	761.2	755.771	755.771	5.42857		10	817.486	818.343	829.007	821.612	6.41847
	12	825.714	819.286	821	822	3.32891		12	916.857	907.429	922.967	915.751	7.82807
	14	1008.79	1013.33	1005.06	1009.06	4.1431		14	993.394	984.939	986.491	988.275	4.50072
	16	1026.67	1019.97	1018.82	1021.82	4.2382		16	1022.27	1015.58	1020.39	1019.41	3.45423
	18	1020.24	1009.35	1022.29	1017.29	6.95388		18	1039.06	1046.71	1051.27	1045.68	6.16932
	20	1020.46	1042.87	1031.67	1031.67	11.2069		20	1067.93	1063.34	1050.65	1060.64	8.95352
	pET-Bteqβgluc							pPIC-Bteqβgluc
	1/S	1/V			Average	STD		1/S	1/V			Average	STD
		1	2	3					1	2	3
	0.5	0.00348606	0.00343811	0.00361197	0.00351053	8.97955e-05		0.5	0.00314183	0.00328638	0.00325163	0.00322543	7.54529e-05
	0.25	0.00244141	0.00248651	0.0024653	0.00246427	2.25655e-05		0.25	0.00203063	0.00212121	0.00210422	0.00208461	4.81462e-05
	0.166667	0.00179019	0.00174381	0.00175738	0.00176358	2.38458e-05		0.166667	0.0015187	0.00151083	0.00155825	0.00152898	2.54111e-05
	0.125	0.00141437	0.00139978	0.00137795	0.00139721	1.83278e-05		0.125	0.00123911	0.00126336	0.00125592	0.00125271	1.24189e-05
	0.1	0.00133272	0.00131372	0.00132315	0.00132315	9.50453e-06		0.1	0.00122326	0.00122198	0.00120626	0.00121712	9.46675e-06
	0.0833333	0.00121107	0.00122058	0.00121803	0.00121655	4.91863e-06		0.0833333	0.00109068	0.00110202	0.00108346	0.001092	9.35206e-06
	0.0714286	0.000991289	0.000986842	0.000994965	0.000991021	4.06747e-06		0.0714286	0.00100665	0.00101529	0.00101369	0.00101186	4.59774e-06
	0.0625	0.000974026	0.000980421	0.000981529	0.000978648	4.05029e-06		0.0625	0.000978213	0.000984663	0.000980014	0.000980956	3.32836e-06
	0.0555556	0.000980166	0.000990734	0.000978192	0.000983	6.74371e-06		0.0555556	0.000962409	0.000955378	0.000951232	0.000956318	5.65043e-06
	0.05	0.00097995	0.000958889	0.000969305	0.000969305	1.05309e-05		0.05	0.00093639	0.000940429	0.000951794	0.000942826	7.98725e-06

## Sheet: Arrhenius plot
	pET-Bteqβgluc							pPIC-Bteqβgluc
	Temp (°C)	Specific Activity (U/mg)	Temp (K)	1/K	1/k (1000)	ln (Specific Activity)		Temp (°C)	Specific Activity (U/mg)	Temp (K)	1/K	1/k (1000)	ln (Specific Activity)
	30	397.971	303	0.00330033	3.30033	5.98638		30	410.989	303	0.00330033	3.30033	6.01857
	35	552.63	308	0.00324675	3.24675	6.31469		35	654.78	308	0.00324675	3.24675	6.4843
	40	733.8	313	0.00319489	3.19489	6.59824		40	898.535	313	0.00319489	3.19489	6.80077
	45	978.42	318	0.00314465	3.14465	6.88594		45	1027.24	318	0.00314465	3.14465	6.93464
	50	1200.8	323	0.00309598	3.09598	7.09074		50	1268.32	323	0.00309598	3.09598	7.14544
	55	879.65	328	0.00304878	3.04878	6.77952		55	987.54	328	0.00304878	3.04878	6.89522
	60	395.743	333	0.003003	3.003	5.98076		60	474.359	333	0.003003	3.003	6.16196
	70	259.788	343	0.00291545	2.91545	5.55987		70	292.674	343	0.00291545	2.91545	5.67906
	80	202.4	353	0.00283286	2.83286	5.31025		80	204.432	353	0.00283286	2.83286	5.32024
	pET-Bteqβgluc							pPIC-Bteqβgluc
	Temp (°C)	Specific Activity (U/mg)			Average	STD		Temp (°C)	Specific Activity (U/mg)			Average	STD
		1	2	3					1	2	3
	30	406.429	386.514	400.971	397.971	10.2905		30	412.429	398.548	421.994	410.99	11.7889
	35	559.52	547.58	550.79	552.63	6.179		35	643.51	658.24	662.59	654.78	9.99951
	40	734.971	738.629	727.8	733.8	5.50851		40	812.54	794.25	818.067	808.286	12.4655
	45	969.58	980.23	985.45	978.42	8.08834		45	1013.51	1031.21	1037.01	1027.24	12.2439
	50	1216.8	1194.51	1191.09	1200.8	13.9615		50	1234.8	1249.25	1250.35	1244.8	8.6777
	55	873.32	878.22	887.41	879.65	7.15302		55	981.25	985.58	995.79	987.54	7.46553
	60	390.629	400.857	395.743	395.743	5.11429		60	483.829	476.81	485.876	482.171	4.75463
	70	249.273	260.303	269.788	259.788	10.2673		70	269.273	258.139	251.952	259.788	8.7773
	80	194.171	207.629	205.4	202.4	7.21274		80	204.171	197.911	205.117	202.4	3.91605
	pET-Bteqβgluc							pET-Bteqβgluc
	1/k (1000)	In (Specific Activity)			Average	STD		1/k (1000)	ln (Specific Activity)			Average	STD
		1	2	3					1	2	3
	3.30033	6.00741	5.95717	5.99389	5.98638	0.0259974		3.30033	6.02206	5.98783	6.04499	6.01857	0.0287671
	3.24675	6.32708	6.30551	6.31135	6.31469	0.0111561		3.24675	6.46694	6.48957	6.49616	6.4843	0.0153261
	3.19489	6.59983	6.6048	6.59003	6.59824	0.00751556		3.19489	6.70017	6.6774	6.70694	6.69492	0.0154772
	3.14465	6.87686	6.88779	6.8931	6.88594	0.00827784		3.14465	6.92117	6.93849	6.9441	6.93464	0.0119506
	3.09598	7.10398	7.08549	7.08262	7.09074	0.011591		3.09598	7.11866	7.1303	7.13118	7.12673	0.00698505
	3.04878	6.7723	6.7779	6.78831	6.77952	0.00812234		3.04878	6.88883	6.89323	6.90354	6.89522	0.0075494
	3.003	5.96776	5.99361	5.98076	5.98076	0.0129241		3.003	6.18173	6.16712	6.18595	6.1783	0.00988354
	2.91545	5.51855	5.56185	5.59764	5.55987	0.0396036		2.91545	5.59572	5.5535	5.52924	5.55987	0.0336452
	2.83286	5.26874	5.33575	5.32496	5.31025	0.0359795		2.83286	5.31896	5.28782	5.32358	5.31025	0.0194516

## Sheet: Dixon Plot
	pET-Bteqβgluc							pPIC-Bteqβgluc
	pH	Specific activity (u/mg)	log 10 Vmax					pH	Specific activity (u/mg)	log 10 Vmax
	4	482.746	2.68372					4	525.603	2.72066
	5	1200.8	3.07947					5	1200.8	3.07947
	6	886.16	2.94751					6	822.16	2.91496
	8	379.229	2.5789					8	476.371	2.67795
	pET-Bteqβgluc							pPIC-Bteqβgluc
	pH	log 10 Vmax			Average	STD		pH	log 10 Vmax			Average	STD
		1	2	3					1	2	3
	4	2.66716	2.68982	2.6937	2.68372	0.0143366		4	2.71275	2.7181	2.73092	2.72066	0.00934048
	5	3.08522	3.07667	3.07647	3.07947	0.00499596		5	3.08522	3.07856	3.07457	3.07947	0.00538121
	6	2.95475	2.9402	2.94746	2.94751	0.00727805		6	2.92233	2.91007	2.91237	2.91496	0.00651636
	8	2.56239	2.58103	2.59274	2.5789	0.0153048		8	2.68067	2.66279	2.68994	2.67795	0.0138031

## Sheet: Relative Activity
	pET-Bteqβgluc										pPIC-Bteqβgluc
	pH	% relative activity	STD		Temperature (°C)	% relative activity	STD				pH	% relative activity	STD		Temperature (°C)	% relative activity	STD
	2	2.76244	0.456589		30	33.1422	3.0345				2	2.76244	0.456589		30	31.9707	3.0345
	4	40.202	2.55408		40	55.4154	9.17219				4	43.7711	1.3419		40	64.933	2.94965
	5	100	2.26274		50	100	2.26274				5	100	2.26274		50	100	14.1421
	6	73.7975	4.25395		60	32.9566	0.723269				6	68.4677	1.99121		60	38.7349	1.64857
	8	31.5813	2.0001		70	21.6346	2.90128				8	39.6712	0.424264		70	20.8698	2.90128
	10	5.01459	0.252405		80	16.8554	3.99212				10	5.01459	0.252405		80	16.2596	3.99212
	12	2.49596	0.13334								12	2.49596	0.13334

## Sheet: pH and Thermal stability
		pET-Bteqβgluc							pPIC-Bteqβgluc
		pH	% residual activity	STD					pH	% residual activity	STD
		2	44.466	1.83967					2	44.9584	1.73187
		4	99.53	0.0981353					4	99.4661	0.365306
		5	99.8529	0.086209					5	99.8687	0.0745108
		6	99.4613	0.151636					6	99.9067	0.0775041
		8	98.921	0.432725					8	99.7772	0.250958
		10	51.3713	1.3142					10	53.5856	1.65258
		12	35.1779	1.69616					12	35.0667	1.47374
		pET-Bteqβgluc							pET-Bteqβgluc
		Time (min)	Temperature (°C)						Time (min)	Temperature (°C)
			50	55	60	70	80			50	55	60	70	80
		0	100	100	100	100	100		0	100	100	100	100	100
		30	100	95.9533	75.3459	71.8365	65.8711		30	100	95.9033	79.8667	76.1467	69.8233
		60	99.5	86.35	66.3899	59.0723	56.3522		60	99.7	86.9133	70.3733	62.6167	59.7333
		120	99.4	80.64	48.1258	37.7862	37.3962		120	99.7	80.98	51.0133	40.0533	39.64
		180	99.0667	73.86	38.9591	32.239	28.9874		180	99.4	73.76	41.2967	34.1733	30.7267
		pET-Bteqβgluc							pET-Bteqβgluc
		Time (min)	STD						Time (min)	STD
			50	55	60	70	80			50	55	60	70	80
		0	0	0	0	0	0		0	0	0	0	0	0
		30	0	0.255408	1.27388	0.802349	0.48181		30	0	0.409919	1.35031	0.85049	0.510718
		60	0.866025	1.01838	0.765043	1.10705	0.575111		60	0.519615	0.593408	0.810946	1.17347	0.609617
		120	1.03923	0.701641	0.959362	0.967629	0.899943		120	0.519615	0.508626	1.01692	1.02569	0.953939
		180	0.950438	0.645058	0.755679	0.944402	0.642918		180	0.519615	0.49	0.80102	1.00107	0.681493
